# Supplementary material
Source: Springer Nature journal article supplement (https://www.springermedizin.de/resource/supplementary/12968_2014_3952_MOESM1_ESM.pdf/9584954)

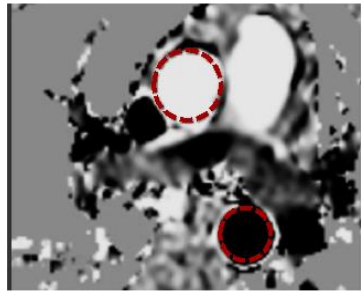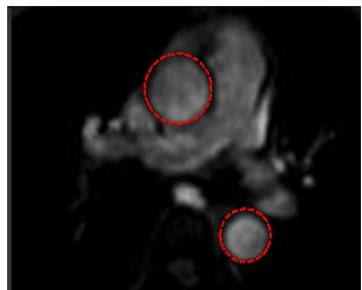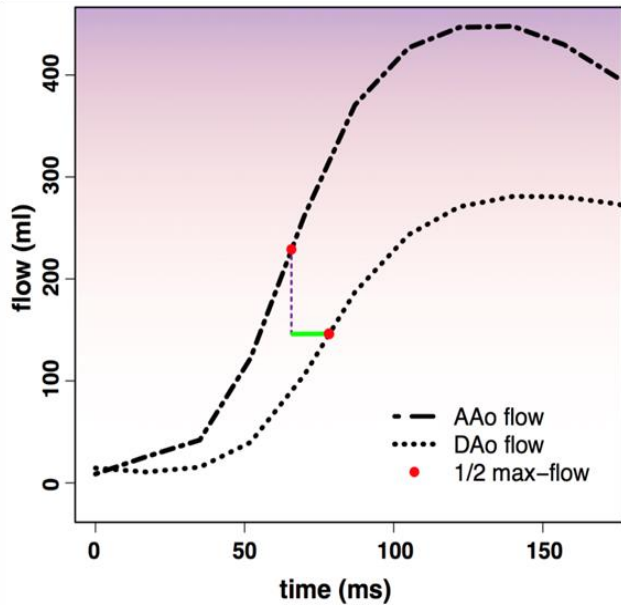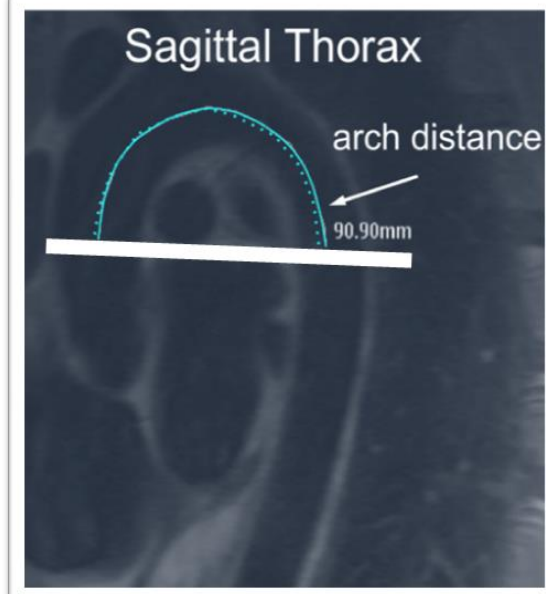

Supplement: MOESM1 [file 9584954]
